## 1 **The DOE Systems Biology Knowledgebase (KBase)**

2 Adam P Arkin, Rick L Stevens, Robert W Cottingham, Sergei Maslov, Christopher S Henry,  
3 Paramvir Dehal, Doreen Ware, Fernando Perez, Nomi L Harris, Shane Canon, Michael W  
4 Sneddon, Matthew L Henderson, William J Riehl, Dan Gunter, Dan Murphy-Olson, Stephen  
5 Chan, Roy T Kamimura, Thomas S Brettin, Folker Meyer, Dylan Chivian, David J Weston,  
6 Elizabeth M Glass, Brian H Davison, Sunita Kumari, Benjamin H Allen, Jason Baumohl, Aaron A  
7 Best, Ben Bowen, Steven E Brenner, Christopher C Bun, John-Marc Chandonia, Jer-Ming Chia,  
8 Ric Colasanti, Neal Conrad, James J Davis, Matthew DeJongh, Scott Devoid, Emily Dietrich,  
9 Meghan M Drake, Inna Dubchak, Janaka N Edirisinghe, Gang Fang, José P Faria, Paul M  
10 Frybarger, Wolfgang Gerlach, Mark Gerstein, James Gurtowski, Holly L Haun, Fei He, Rashmi  
11 Jain, Marcin P Joachimiak, Kevin P Keegan, Shinnosuke Kondo, Vivek Kumar, Miriam L Land,  
12 Marissa Mills, Pavel Novichkov, Taeyun Oh, Gary J Olsen, Bob Olson, Bruce Parrello, Shiran  
13 Pasternak, Erik Pearson, Sarah S Poon, Gavin A Price, Srividya Ramakrishnan, Priya Ranjan,  
14 Pamela C Ronald, Michael C Schatz, Samuel M D Seaver, Maulik Shukla, Roman A Sutormin,  
15 Mustafa H Syed, James Thomason, Nathan L Tintle, Daifeng Wang, Fangfang Xia, Hyunseung  
16 Yoo, Shinjae Yoo

## 17 **Abstract**

18 The U.S. Department of Energy Systems Biology Knowledgebase (KBase) is an open-source  
19 software and data platform designed to meet the grand challenge of systems biology—  
20 predicting and designing biological function from the biomolecular (small scale) to the ecological  
21 (large scale). KBase is available for anyone to use, and enables researchers to collaboratively  
22 generate, test, compare, and share hypotheses about biological functions; perform large-scale  
23 analyses on scalable computing infrastructure; and combine experimental evidence and  
24 conclusions that lead to accurate models of plant and microbial physiology and community  
25 dynamics. The KBase platform has (1) extensible analytical capabilities that currently include  
26 genome assembly, annotation, ontology assignment, comparative genomics, transcriptomics,  
27 and metabolic modeling; (2) a web-browser-based user interface that supports building, sharing,  
28 and publishing reproducible and well-annotated analyses with integrated data; (3) access to  
29 extensive computational resources; and (4) a software development kit allowing the community  
30 to add functionality to the system.

## 31 **Introduction**

32 Over the past two decades, the scale and complexity of genomics technologies and data have  
33 advanced from simple genomic sequences of only a few organisms to metagenomes and  
34 genome variation, gene expression, metabolite, and phenotype data for thousands of organisms  
35 and their communities. A major challenge in this data-rich age of biology is integrating  
36 heterogeneous, distributed, and error-prone primary and derived data into predictive models of  
37 biological function ranging from a single gene to entire organisms and their ecologies. To  
38 develop models of these biological processes, organisms and their interactions, scientists of  
39 diverse backgrounds need, at a minimum, the ability to use a variety of sophisticated  
40 computational tools to analyze their own complex and heterogeneous data sets, and then

41 integrate their data and results effectively with the work of others. Such integration requires  
42 discovering and accessing others' information, understanding its source and limitations, and  
43 using tools to perform additional analyses upon it. Ideally, new data and conclusions would be  
44 rapidly propagated across existing, related analyses and easily discovered by the community for  
45 evaluation and comparison with previous results<sup>1-3</sup>.

46 Nowhere are the barriers to discovery, characterization, and prediction more formidable than in  
47 efforts to understand the complex interplay between biological and abiotic processes that  
48 influence soil, water, and climate dynamics and impact the productivity of our biosphere. A  
49 bewildering diversity of plants, microbes, animals, and their interactions needs to be discovered  
50 and characterized to mechanistically understand ecological function and thereby facilitate  
51 interventions to improve outcomes. The U.S. Department of Energy (DOE) has invested in  
52 various large- and small-scale programs in climate and environmental science and biological  
53 system science. These efforts have demonstrated the power of integrated science programs to  
54 make progress on complex systems. However, the community that has grown around these  
55 efforts has recognized the need to lower the barrier to accessing tools, data, and results, and to  
56 work collaboratively to accelerate the pace of their research<sup>4</sup>.

57 The DOE Systems Biology Knowledgebase (KBase, [www.kbase.us](http://www.kbase.us)) is a software platform  
58 designed to provide these needed capabilities. Specifically, KBase seeks to make it easier for  
59 scientists to create, execute, collaborate on, and share sophisticated reproducible analyses of  
60 their own biological data in the context of public and other users' data. Results and conclusions  
61 can be shared with individuals or published within KBase's integrated data model that will  
62 increasingly support user-driven and automated meta-analysis.

63 While a number of recent computational environments address different aspects of this  
64 challenge (see *Comparison with other Platforms*), they are generally decentralized, limiting the  
65 extent to which data and workflows can be integrated, shared, and extended across the  
66 scientific community. Moreover, there is minimal support for key capabilities such as more  
67 iterative scientific analysis, in-depth collaboration, integration of new results in the context of  
68 others' results, and automatic propagation of new findings that may inform research across  
69 disciplines.

70 KBase users have already applied the system to address a range of scientific problems,  
71 including comparative genomics of plants, prediction of microbiome interactions, and deep  
72 metabolic modeling of environmental and engineered microbes. KBase currently supports a  
73 growing and extensible set of applications or "apps" for genome assembly, annotation,  
74 metabolic model reconstruction, flux balance analysis, expression analysis, and comparative  
75 genomics. In addition to these tools, the KBase platform provides data integration and search,  
76 along with easy access to shared user analyses of public plant and microbial reference data  
77 from a number of external resources including National Center for Biotechnology Information  
78 (NCBI) and the DOE Joint Genome Institute (see *KBase Data Model and Apps*). As the platform  
79 matures and is adopted more widely, the data, analysis tools, and computational experiments  
80 contributed by users are also expected to increase, leading to wider biological applications with  
81 richer and more sophisticated support for functional prediction and comparison.

82 Based on a service-oriented design, KBase is built to run primarily on a cloud-computing  
83 infrastructure, although high-performance computing (HPC) resources are only now being  
84 integrated. The platform is completely open source, with all core infrastructure and service code  
85 available on GitHub (<https://github.com/kbase>). The central instance of KBase that serves  
86 analysis and modeling of plants, microbes, and their communities is maintained and run on  
87 DOE enterprise computing resources. This resource is open and free for anyone to use.

## 88 KBase Narratives and User Interface

89 KBase's graphical user interface, the Narrative Interface, supports both point-and-click and  
90 scripting access to system functionality in a "notebook" environment, enabling computational  
91 sophisticates and experimentalists to easily collaborate within the same platform. Built on the  
92 Jupyter Notebook<sup>5</sup>, the interface allows researchers to design, carry out, record and share  
93 computational experiments in the form of *Narratives*—dynamic, interactive documents that  
94 include all the data, analysis steps, parameters, visualizations, scripts, commentary, results, and  
95 conclusions of an experiment (Fig. 1).

The screenshot displays the KBase Narrative Interface for a publication titled "Alice Comparative Genomics". The interface is divided into several sections:

- Data:** A list of genomic datasets, including "Shewanella\_tree\_genome\_set.v1" and "GenomeComparisons".
- Apps & Methods:** A sidebar containing various analysis tools such as "Align Reads using Bowtie2", "Annotate Domains in a Genome", and "Annotate Microbial Contigs".
- Analysis Steps:** A central workspace showing a workflow. The current step is "Step 2: Identify phylogenetically close genomes to compare against my strain". Below this is a table of search results for Shewanella genomes.
- Visuals:** A phylogenetic tree visualization showing the relationship between the user's genome and other Shewanella species.
- Custom Scripts:** A section for running user-defined scripts.
- Sharing and Comments:** Icons for sharing the narrative and adding comments.

| ID   | Genome ID  | Scientific Name                 | Domain   | Length | Contigs | Genes | Check     | Share |
|------|------------|---------------------------------|----------|--------|---------|-------|-----------|-------|
| O 1  | ksfp_24201 | Shewanella stansburiana         | Bacteria | 46,20  | 18      | 4,201 | 4,617,978 |       |
| O 2  | ksfp_16326 | Shewanella arctica W99-089      | Bacteria | 46,09  | 1       | 2,963 | 5,957,074 |       |
| O 3  | ksfp_2704  | Shewanella intima O552          | Bacteria | 44,72  | 1       | 4,179 | 4,942,503 |       |
| O 4  | ksfp_26326 | Shewanella sp. M8-4             | Bacteria | 47,89  | 1       | 4,084 | 4,762,287 |       |
| O 5  | ksfp_2627  | Shewanella sp. M8-7             | Bacteria | 47,64  | 2       | 4,147 | 4,779,079 |       |
| O 6  | ksfp_16326 | Shewanella halifaxensis W99-084 | Bacteria | 44,99  | 1       | 4,355 | 5,225,976 |       |
| O 7  | ksfp_101   | Shewanella arctica M8-1         | Bacteria | 45,89  | 2       | 4,177 | 5,119,494 |       |
| O 8  | ksfp_172   | Shewanella arctica M8-1         | Bacteria | 45,89  | 2       | 4,147 | 5,119,424 |       |
| O 9  | ksfp_169   | Shewanella arctica O527         | Bacteria | 45,15  | 1       | 3,963 | 4,546,968 |       |
| O 10 | ksfp_1650  | Shewanella baltica NCHB 600     | Bacteria | 45,08  | 1       | 4,293 | 4,845,237 |       |
| O 11 | ksfp_1032  | Shewanella sp. W3-31            | Bacteria | 44,63  | 1       | 4,287 | 4,708,380 |       |
| O 12 | ksfp_163   | Shewanella baltica O199         | Bacteria | 45,99  | 129     | 4,233 | 4,561,949 |       |
| O 13 | ksfp_184   | Shewanella arctica M8-8         | Bacteria | 43,59  | 1       | 3,710 | 4,304,142 |       |
| O 14 | ksfp_162   | Shewanella sp. J99-41           | Bacteria | 46,53  | 43      | 4,086 | 4,464,227 |       |
| O 15 | ksfp_169   | Shewanella baltica P1-4         | Bacteria | 43,61  | 1       | 3,844 | 4,602,044 |       |
| O 16 | ksfp_190   | Shewanella sp. P1-4             | Bacteria | 43,74  | 102     | 3,709 | 4,474,326 |       |
| O 17 | ksfp_195   | Shewanella baltica O558         | Bacteria | 46,23  | 3       | 4,881 | 5,242,916 |       |
| O 18 | ksfp_182   | Shewanella putrefaciens CN-32   | Bacteria | 44,45  | 1       | 4,110 | 4,639,220 |       |
| O 19 | ksfp_433   | Shewanella putrefaciens W99     | Bacteria | 43,29  | 1       | 4,750 | 5,394,476 |       |
| O 20 | ksfp_2990  | Shewanella baltica O557         | Bacteria | 46,03  | 4       | 5,057 | 5,524,068 |       |
| O 21 | ksfp_2991  | Shewanella baltica O580         | Bacteria | 46,14  | 41      | 4,531 | 5,034,934 |       |
| O 22 | ksfp_1655  | Shewanella baltica O585         | Bacteria | 46,27  | 2       | 4,819 | 5,261,965 |       |
| O 23 | ksfp_1199  | Shewanella putrefaciens 200     | Bacteria | 44,4   | 94      | 4,377 | 4,892,505 |       |
| O 24 | ksfp_1346  | Shewanella baltica O1223        | Bacteria | 46,27  | 4       | 4,646 | 5,398,884 |       |
| O 25 | ksfp_122   | Shewanella vesidii ATCC 35048   | Bacteria | 43,71  | 1       | 3,683 | 5,192,403 |       |

96

97 **Figure 1.** KBase Narratives. A Narrative is an interactive, dynamic, and persistent document created by  
98 users that promotes open, reproducible, and collaborative science.

99 Although private by default, users can choose to share their Narratives and data with select  
100 collaborators or even publicly. Sharing among collaborators facilitates communication, reuse  
101 and management of scientific projects. Public Narratives serve as critical resources for the

102 broader user community by capturing valuable data sets, associated computational analyses,  
103 and enriched scientific context describing the rationale and design of original experiments, data  
104 upload and organization, and the application of various analytical techniques, complete with the  
105 selected parameters and interpretation of results. Narrative sharing and publication are key  
106 capabilities enabling other scientists to quickly view, copy, replicate, and expand on work  
107 performed within KBase. A growing number of public Narratives are available in KBase today,  
108 several of which are described in detail in the “Science Performed within the KBase Platform”  
109 section. A selection of these is also available in the KBase Narrative Library  
110 ([www.kbase.us/narrative-library](http://www.kbase.us/narrative-library)).

111 Because Narratives are built upon the Jupyter Notebook framework, users can create and run  
112 scripts within a Narrative using a “code cell.” KBase is building a code cell application  
113 programming interface (API) enabling users to run KBase apps programmatically from within the  
114 system. Users also can leverage the flexibility of code cells to incorporate custom analysis steps  
115 into their Narratives not yet available as KBase apps.

## 116 **KBase Data Model and Apps**

117 KBase provides a seamless amalgamation of (1) curated and periodically updated reference  
118 data, (2) uploaded private and shared user data (and derived data products), and (3) a growing  
119 compendium of apps covering a wide range of analytical capabilities. KBase’s reference  
120 database includes all public genome sequences from RefSeq<sup>6</sup> and Phytozome<sup>7</sup> and selected  
121 plant genomes from Ensembl<sup>8</sup>. These genomes are maintained with their original gene IDs and  
122 annotations, along with updated gene calls and annotations provided by the KBase annotation  
123 pipeline. The reference collection also contains biochemistry data, including 27,692 biochemical  
124 compounds, 34,705 reactions, and 529 growth media formulations, and integrates many  
125 prominent ontologies such as GO<sup>9</sup>, SEED Subsystems<sup>10</sup>, PFam<sup>11</sup>, and Interpro<sup>12</sup>. All reference  
126 data are periodically updated from source databases and are available for integration with user  
127 data where appropriate (e.g., when identifying isofunctional genes or building species trees).

128 KBase’s faceted search utility enables users to query reference data by text, DNA sequence, or  
129 protein sequence. Genomes and genes identified through searches can be copied to a  
130 Narrative for deeper analysis. Ultimately, the search utility will be extended to query the user  
131 data in KBase, while still ensuring appropriate data privacy. This capability will facilitate the  
132 process by which users search their own data and data shared with them by collaborators.

133 In addition to reference data, KBase stores a wide range of uploaded and derived data sets  
134 shared by users and connected to analyses performed in Narratives (Fig. 2A). Currently  
135 supported data objects include reads, contigs, genomes, metabolic models, growth media,  
136 RNA-seq, expression, growth phenotype data, and flux balance analysis solutions. This set of  
137 data objects is fully extensible, and the links among them are expanded as new data sources  
138 and apps are added to the platform. Third-party developers cannot yet extend the KBase data  
139 model, but providing this capability is an important near-term goal.

140 KBase currently has over 70 released apps in production offering diverse scientific functionality  
141 for genome assembly, genome annotation<sup>13</sup>, sequence homology analysis, tree building<sup>14</sup>,

142 comparative genomics, metabolic modeling<sup>15</sup>, community modeling<sup>16</sup>, gap-filling<sup>17,18</sup>, RNA-seq  
 143 processing<sup>19</sup>, and expression analysis<sup>20</sup>. In addition there are dozens of beta (pre-release) apps  
 144 available to try. Apps are engineered to interoperate seamlessly to enable a range of scientific  
 145 workflows (Fig. 2B). Current apps, production and beta, with their associated documentation are  
 146 listed in the KBase App Catalog (<https://narrative.kbase.us/#appcatalog>). KBase enables third-  
 147 party developers to add their own apps for use by the broad scientific community (see KBase  
 148 Software Development Kit section).

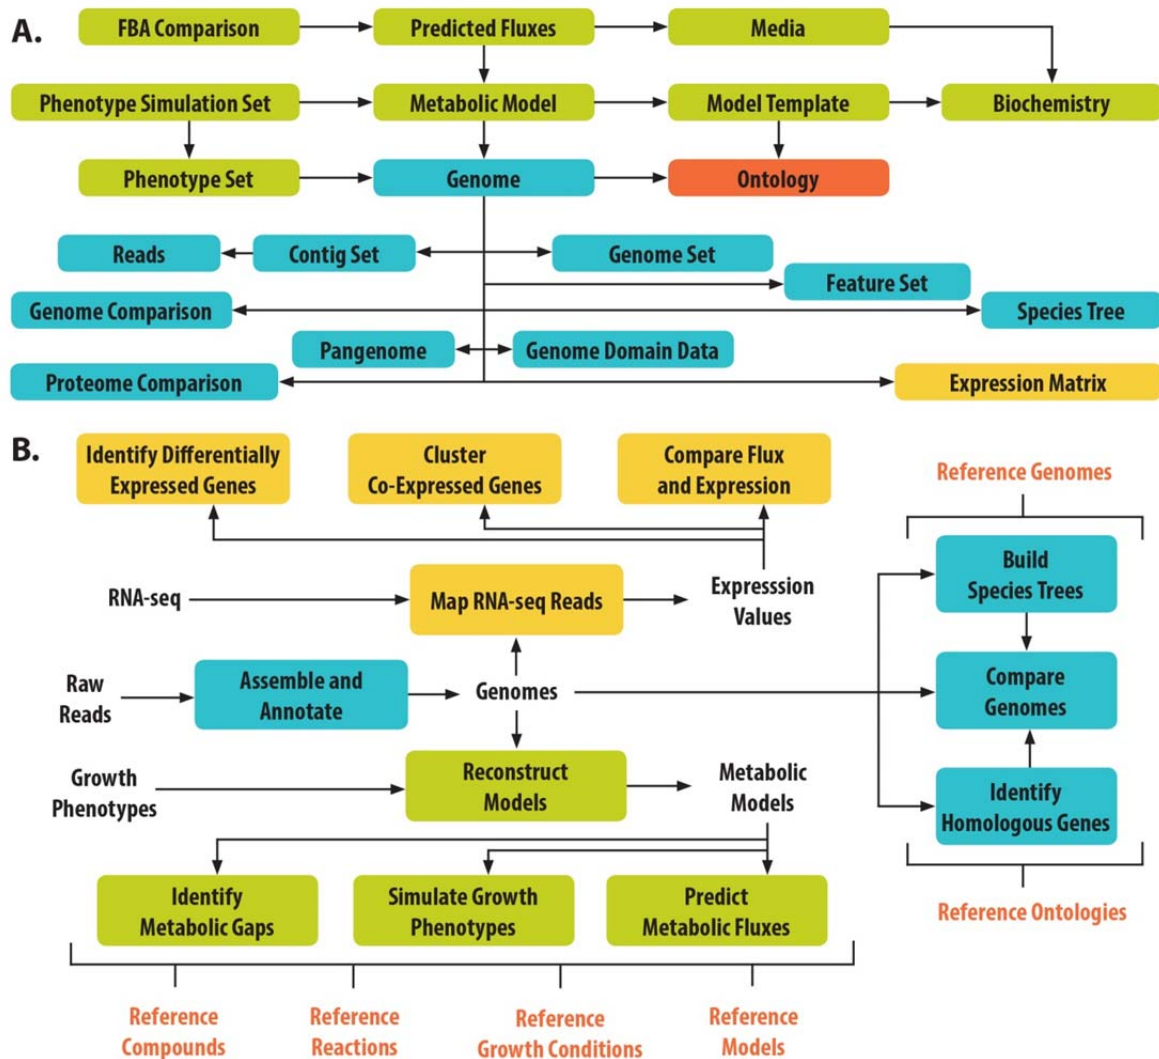

149 **Figure 2.** Currently supported (A) data types and (B) workflows in the KBase platform. KBase integrates  
 150 data types and apps for analyzing and comparing genomes (blue), transcriptomes (orange), and  
 151 metabolic models (green).  
 152

### 153 Support for Reproducible, Interdisciplinary, Collaborative Science

154 The KBase platform is designed from the ground up to comprehensively support reproducible,  
 155 interdisciplinary, and collaborative science. KBase's object-based data store, for example, holds

156 all user and reference data, and all objects, including Narratives themselves, have their own  
157 provenance and version information. Provenance data capture when, how, and by whom each  
158 object was created, including the apps or upload tools used and their associated parameters  
159 and files. All apps and data are also versioned, so that even if a user overwrites an object or an  
160 app is updated, the original information is recoverable. These provenance and reversibility  
161 features ensure that all science performed within KBase is fully specified and reproducible,  
162 averting the time-consuming effort often required to understand how published computational  
163 studies or even simple data analyses were carried out.

164 Collaboration in KBase is supported by the ease with which all data in the system may be  
165 shared and copied among users. A user may share any Narrative that they own (or have  
166 administrative access to) with other KBase users simply by searching for their names or email  
167 addresses. Importantly, when a user shares a Narrative, they also are sharing all the data  
168 objects loaded, used, or generated within the Narrative, complete with versioning and  
169 provenance. This feature allows users to share every aspect of the science that they have done  
170 in KBase. Three levels of sharing are supported: (1) *read* sharing lets others see and copy, but  
171 not edit the Narrative and its associated data; (2) *write* sharing expands these privileges to  
172 include editing, enabling users to work together on a single Narrative; and (3) *admin* sharing  
173 allows others to edit the Narrative and also share it with third parties. Moreover, any Narrative  
174 can be made public by the user who owns it, which essentially gives all KBase users read  
175 access to that Narrative and its underlying data. Users with read privileges for a Narrative can  
176 create their own copy, which they own and can edit. This copying feature enables users to  
177 quickly replicate and expand on any KBase Narrative shared with them. This approach to  
178 sharing facilitates interdisciplinary science by allowing researchers with different expertise to  
179 quickly and easily exchange data, results, methodologies, and workflows used to solve complex  
180 biological problems.

181 We demonstrate how KBase facilitates sharing, collaboration, and interdisciplinary research with  
182 a series of example Narratives (Fig. 3 and Table 1) from two scientists: Alice, a wet-lab biologist  
183 with expertise in assembly, annotation, and comparative genomics, and Bob, a computational  
184 biologist with expertise in metabolic modeling. (Before proceeding to view these Narratives, sign  
185 up for a KBase User Account at [www.kbase.us](http://www.kbase.us)) In the first Narrative (Table 1, Narrative 1), Alice  
186 uploads raw reads from a new strain of *Shewanella* that she is analyzing. She uses KBase to  
187 assemble and annotate these reads, generating a new genome object in KBase. In a second  
188 Narrative (Table 1, Narrative 2), Alice compares her new genome with other close strains of  
189 *Shewanella*. She finds growth phenotype data for *Shewanella oneidensis* MR-1, which is  
190 phylogenetically close to her strain<sup>21</sup>. This inspires Alice to run a growth phenotype array on her  
191 own strain, which she also uploads to KBase. Alice then compares both phenotype arrays and  
192 notices many differences that she cannot explain.

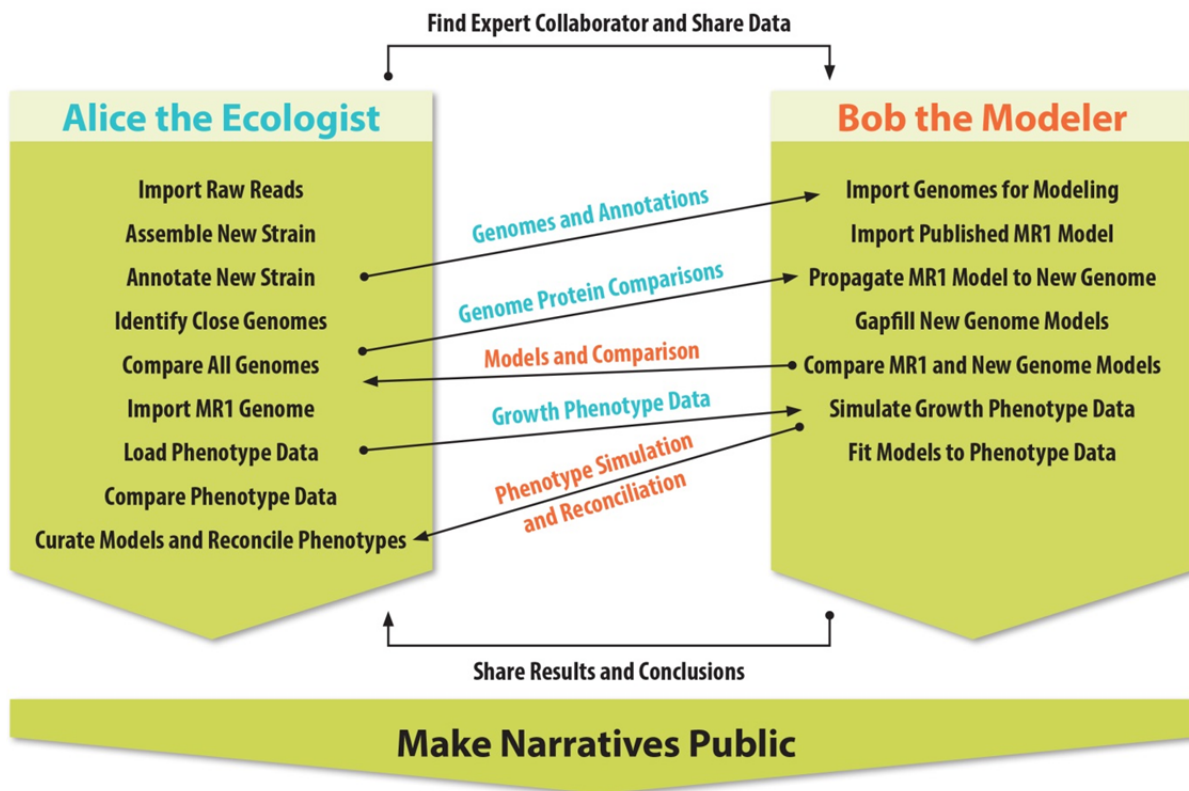

193

194 **Figure 3.** Example of collaboration in KBBase. Two researchers collaborate using Narratives to reach more  
195 complete scientific conclusions than either could have achieved alone.

196

197 At this point, Alice contacts Bob, who suggests that metabolic models can help her analyze the  
198 Biolog phenotype data. Alice shares her Narratives with Bob, who copies her genomes into a  
199 new third Narrative. In this third Narrative (Table 1, Narrative 3), Bob loads a published model of  
200 *S. oneidensis* MR-1<sup>22</sup>, which he then propagates to Alice's genome. Bob compares the models,  
201 identifying some interesting metabolic differences. Then Bob creates a fourth Narrative (Table 1,  
202 Narrative 4), where he imports Alice's Biolog data and simulates the data with his *Shewanella*  
203 models. He optimizes his models to fit the Biolog data and shares the results with Alice.

204 Finally, they build a fifth Narrative (Table 1, Narrative 5) together in which Alice refines Bob's  
205 models by replacing gap-filled reactions with more biologically relevant selections, gaining a  
206 complete understanding of the differences between her strain and MR-1. All data used in this  
207 example are real: Alice's raw reads are from an existing genome, *Shewanella amazonensis*  
208 SB2B<sup>23,24</sup>, and the growth phenotype data are from an existing experimental study<sup>25</sup>. The  
209 computational experiment carried out in the five Narratives results in the development and  
210 validation of a new genome-scale metabolic model of *S. amazonensis* SB2B in KBBase, as well  
211 as the improvement of the existing model for *S. oneidensis* MR-1.

212 **Table 1.** Example workflows demonstrating collaboration using KBase. (Sign up for a KBase  
213 User Account at [www.kbase.us](http://www.kbase.us) before clicking the links to view these Narratives. This table with  
214 active links is also available online at [www.kbase.us/kbase-paper](http://www.kbase.us/kbase-paper).)  
215

---

| Narrative # | Title and URL                                                                                                                                                                         |
|-------------|---------------------------------------------------------------------------------------------------------------------------------------------------------------------------------------|
| 1           | Alice Narrative 1: Assembly and Annotation<br>( <a href="https://narrative.kbase.us/narrative/ws.18152.obj.1">https://narrative.kbase.us/narrative/ws.18152.obj.1</a> )               |
| 2           | Alice Narrative 2: Comparative Genomics<br>( <a href="https://narrative.kbase.us/narrative/ws.18153.obj.1">https://narrative.kbase.us/narrative/ws.18153.obj.1</a> )                  |
| 3           | Bob Narrative: Build Metabolic Models<br>( <a href="https://narrative.kbase.us/narrative/ws.18155.obj.1">https://narrative.kbase.us/narrative/ws.18155.obj.1</a> )                    |
| 4           | Bob and Alice Narrative 1: Phenotype Data Analysis<br>( <a href="https://narrative.kbase.us/narrative/ws.18156.obj.1">https://narrative.kbase.us/narrative/ws.18156.obj.1</a> )       |
| 5           | Bob and Alice Narrative 2: Phenotype Data Reconciliation<br>( <a href="https://narrative.kbase.us/narrative/ws.18157.obj.1">https://narrative.kbase.us/narrative/ws.18157.obj.1</a> ) |

---

216  
217 This example demonstrates the novel, collaborative science that can be done in KBase using  
218 the extensive portfolio of tools and data currently in the system. KBase provides some new  
219 analysis tools (e.g., community modeling<sup>16</sup> and growth phenotype gap-filling) that are not yet  
220 available in any other platform. KBase also makes accessible a number of third-party, open-  
221 source tools with the goal of making them easier to use and more powerful when integrated with  
222 existing tools in the broader KBase ecosystem. Equally important in this example is how  
223 KBase's user interface facilitates a seamless collaboration between scientists with different but  
224 complementary expertise who are able to accomplish more together than they could  
225 individually. Finally, it is important to note how KBase reference data (such as genomes, media  
226 conditions, and biochemistry) can be integrated into users' analyses, enhancing their work and  
227 offering new perspectives.

## 228 **Science Performed Within the KBase Platform**

229 KBase launched the first version of the Narrative user interface in February 2015. Since then,  
230 more than 1200 users have signed up for KBase accounts, and over 750 have created at least  
231 one Narrative. Excluding KBase staff, users have built 2657 Narratives, 294 of which have been  
232 shared with at least one other user and 37 have been made public. These Narratives contain  
233 255,148 data objects, or an average of 96 data objects and five apps per Narrative. In these  
234 Narratives, users have applied KBase to address a wide range of scientific questions. Here we  
235 highlight seven peer-reviewed publications that cite publicly available Narratives in KBase,  
236 where the bulk of the analysis described in the publication was performed. These and other  
237 science Narratives can be found in KBase's Narrative Library, [www.kbase.us/narrative-library](http://www.kbase.us/narrative-library).

238



239 **Table 2.** Example Narratives Demonstrating the Use of KBase (sign up for a KBase User  
240 Account at [www.kbase.us](http://www.kbase.us) before clicking the links to view these Narratives.)  
241

---

| Narrative # | Title and URL                                                                                                                                                                                                                       |
|-------------|-------------------------------------------------------------------------------------------------------------------------------------------------------------------------------------------------------------------------------------|
| 1           | The PlantSEED Resource in KBase<br>( <a href="https://narrative.kbase.us/narrative/ws.15250.obj.1">https://narrative.kbase.us/narrative/ws.15250.obj.1</a> )                                                                        |
| 2           | Microbial Comparative Genomics: Reconstruction and Comparison of Core Metabolism Across Microbial Life<br>( <a href="https://narrative.kbase.us/narrative/ws.15253.obj.1">https://narrative.kbase.us/narrative/ws.15253.obj.1</a> ) |
| 3           | Community Modeling Protocol: Multi-Species Model Reconstruction and Analysis ( <a href="https://narrative.kbase.us/narrative/ws.10824.obj.1">https://narrative.kbase.us/narrative/ws.10824.obj.1</a> )                              |
| 4           | BP1 Meio Community Metabolic Modeling<br>( <a href="https://narrative.kbase.us/narrative/ws.13838.obj.1">https://narrative.kbase.us/narrative/ws.13838.obj.1</a> )                                                                  |
| 5           | Electrosynthetic Microbiome: Electrosynthesis Community Model<br>( <a href="https://narrative.kbase.us/narrative/ws.15248.obj.1">https://narrative.kbase.us/narrative/ws.15248.obj.1</a> )                                          |
| 6           | Comparative analysis of phylogenetically close genomes and their associated growth phenotypes ( <a href="https://narrative.kbase.us/narrative/ws.8773.obj.1">https://narrative.kbase.us/narrative/ws.8773.obj.1</a> )               |
| 7           | Computing and Applying Atomic Regulons to Understand Gene Expression and Regulation ( <a href="https://narrative.kbase.us/narrative/ws.14533.obj.1">https://narrative.kbase.us/narrative/ws.14533.obj.1</a> )                       |

---

242 Major applications for KBase include reconstructing, comparing, and analyzing metabolic  
243 models for diverse genomes. In 2015, the PlantSEED metabolic model reconstruction pipeline  
244 was integrated into KBase and used to build genome-scale metabolic models of 10 diverse  
245 reference plant genomes, which were subsequently compared (Table 2, Narrative 1)<sup>26</sup>. More  
246 recently, KBase implemented a core model reconstruction pipeline that was applied to more  
247 than 8000 microbial genomes (Table 2, Narrative 2)<sup>27</sup>. The resulting core models were  
248 compared within a phylogenetic context, identifying how the pathways comprising core  
249 metabolism are clustered across the microbial tree of life.  
250

251 KBase also has a sophisticated, unique pipeline for microbiome modeling and analysis, as  
252 demonstrated by three recent publications. One is a book chapter  
253 ([www.kbase.us/community-modeling/](http://www.kbase.us/community-modeling/)) that explores various microbiome modeling paradigms,  
254 predicting potential interactions between the gut microbes *Bacteroides thetaiotaomicron* and  
255 *Faecalibacterium prausnitzii* as a case study (Table 2, Narrative 3)<sup>16</sup>. Another analysis  
256 examines interactions between an autotrophic carbon-fixing cyanobacteria,  
257 *Thermosynechococcus elongatus* BP-1, and the heterotrophic gram-positive species,  
258 *Meiothermus ruber* Strain A. Model predictions from this analysis were validated by a  
259 combination of published growth-condition data and comparison of model-predicted fluxes with  
260 metatranscriptome-based expression data (Table 2, Narrative 4)<sup>28</sup>. Finally, metagenomic and  
261 metatranscriptomic data from an electrosynthetic microbiome were assembled into genomes,

262 models, and flux predictions for three dominant species in the microbiome (Table 2, Narrative  
263 5)<sup>29</sup>. To our knowledge, no other platform is capable of performing the combination of  
264 community modeling analyses and expression data comparisons demonstrated in these  
265 featured Narratives.

266 KBase also has powerful comparative genomics tools, including newly developed apps for  
267 analyzing phenotype data. These tools are highlighted in a recent publication in which two  
268 phylogenetically close genomes are systematically compared, identifying how changes in gene  
269 content result in changes in growth phenotypes<sup>30</sup> (Table 2, Narrative 6)<sup>31</sup>. In this analysis, an  
270 existing metabolic model<sup>32</sup> is propagated to another strain of the same species. The models are  
271 then applied to understand the differences between Biolog data gathered for both species,  
272 including identifying growth conditions where additional experimental validation is needed. The  
273 models are also applied to predict essential and nonessential metabolic genes, with validation  
274 performed via comparison with a recently published TN-seq dataset<sup>33</sup>.

275 In another recent publication leveraging KBase's range of expression tools, expression data are  
276 loaded for five genomes: *Escherichia coli*, *S. oneidensis*, *Pseudomonas aeruginosa*, *Thermus*  
277 *thermophilus*, and *Staphylococcus aureus* (Table 2, Narrative 7)<sup>20</sup>. KBase apps are used to  
278 identify clusters of co-expressed genes in these genomes, and the KBase Software  
279 Development Kit (SDK) is applied to add a new app for computing these clusters. This new app  
280 is compared to the others, and co-expressed clusters are also compared across all five  
281 genomes.

282 These peer-reviewed studies demonstrate KBase's wide range of capabilities and the power of  
283 Narratives in disseminating complex computational analyses that are well documented, easily  
284 reproducible, and extensible.

## 285 **KBase Software Development Kit**

286 Computational approaches to analyzing biological data are heterogeneous and can evolve  
287 rapidly. Accordingly, the KBase platform must be able to integrate new software tools from  
288 diverse sources with varying computational requirements while still maintaining a consistent  
289 data model with data provenance and version history. This integration is accomplished using the  
290 KBase SDK, a set of command-line tools and a web interface enabling any developer or  
291 advanced user to build, test, register, and deploy new or existing software as KBase apps. To  
292 facilitate transparent, reproducible, and open science, all software contributed to the central  
293 KBase software repository must adhere to a standard open-source license  
294 (<https://opensource.org/licenses>). Information about the app developer is maintained in the user  
295 documentation for that app so that credit can be properly given to the contributor. Data  
296 provenance, job management, usage logging, and app versioning are handled automatically by  
297 the platform, allowing developers to contribute new scientific tools quickly with minimal KBase-  
298 specific training.

299 Scientific computation in KBase is managed with a distributed Docker-based<sup>34</sup> execution model.  
300 Docker allows the individual programs and system dependencies of each Narrative app to be  
301 saved as an image and run securely and identically across physical resources within individual,

302 isolated environments called containers. The SDK enables developers to build and configure  
303 images and containers in a standard way, making them directly accessible to Narrative apps.  
304 The Docker execution model is powerful because contributors can test code on their own  
305 machine exactly as it runs on KBase production systems, and containers can be deployed and  
306 executed as soon as they are registered without any other manual intervention or system  
307 deployments. Docker images also provide a basis for reproducible execution of apps in  
308 Narratives.

309 KBase apps built with the SDK include a wide and growing collection of systems biology tools.  
310 The SDK has already been applied by KBase developers and external users to implement all of  
311 the tools presently available in KBase, including all tools mentioned in the "Alice and Bob" use  
312 case example and the science applications described above.

## 313 Comparison with Other Platforms

314 KBase builds on many ideas from previous systems and infrastructures designed to support  
315 large-scale bioinformatics analysis and model building. Many KBase developers have also  
316 worked on other systems including the SEED<sup>35</sup>, MicrobesOnline<sup>36</sup>, RAST<sup>37</sup>, PATRIC<sup>38</sup>, MG-  
317 RAST<sup>39</sup>, ModelSEED<sup>15</sup>, Gramene<sup>40</sup>, iPlant (now CyVerse)<sup>41</sup>, RegTransBase<sup>42</sup>, RegPrecise<sup>43</sup>,  
318 and others.

319 KBase differs from existing systems in several ways. While platforms such as Galaxy<sup>44</sup>,  
320 Taverna<sup>45</sup>, CyVerse, XSEDE<sup>46</sup>, myExperiment<sup>47</sup>, and GenePattern<sup>48</sup> permit a user to develop  
321 and run complex bioinformatics workflows, they currently lack tools for workflow annotation or  
322 predictive modeling. In contrast, systems such as COBRA Toolbox<sup>49</sup>, Pathway Tools<sup>50</sup>, and  
323 RAVEN Toolbox<sup>51</sup> support predictive modeling of metabolism but lack support for genome  
324 assembly, annotation, and comparison. More general computational platforms like Kepler<sup>52</sup>,  
325 Pegasus<sup>53</sup>, Globus<sup>54</sup>, and Jupyter<sup>5</sup> extensively support data and workflow management but lack  
326 integration with bioinformatics analysis tools. Most of these tools do not allow formal integration  
327 of user data with organized reference data or sharing models for data and analyses.

328 A key distinction between KBase and such systems is KBase's extensible core data model,  
329 whose aim is to provide consistent access to and integration of reference data sets and user-  
330 contributed data across all applications, user interfaces, and services such as annotation from  
331 well-curated ontologies. These features mean that KBase users do not have to adjust data files  
332 or formats once data are loaded into the system and that both user and reference data can be  
333 analyzed using the same tools.

334 KBase serves many of the emerging requirements for open, verifiable science supported wholly  
335 or in part by systems such as Galaxy, CyVerse, and Synapse<sup>55</sup>. These capabilities include  
336 promoting reproducibility and transparency by persistently linking data and the analyses used to  
337 produce them. KBase also improves user accessibility to sophisticated computing by providing  
338 an environment populated with tools and data that users can apply on a high-end computing  
339 infrastructure without additional setup or maintenance of any software or hardware. Granular

340 sharing with designated individuals or the community at large is supported as well, with  
341 increasing capabilities for collaborative analysis and editing of data, experiments, and results.

342 The sharing, collaborative editing, and emerging user-discovery systems in KBase are the first  
343 steps toward a social networking and scientific project management system enabling users to  
344 find other researchers working in their areas, form teams, organize data and analytical projects,  
345 and communicate their results effectively.

346 While some systems such as Synapse and Galaxy do provide provenance information on how  
347 particular data files were produced, KBase supports a rich provenance system that integrates  
348 such information with both the KBase data model and social network. This integration enables  
349 more effective discovery of newly integrated reference data and the relevant work products of  
350 other users, paving the way toward a system continually enriched by user contributions and  
351 interactions.

## 352 **Methods**

### 353 **System Architecture**

354 KBase has a scalable service-oriented architecture (Fig. 4) in which core components  
355 communicate through web APIs. The Narrative user interface is the central hub where users  
356 submit computational tasks and manage data. KBase's "Execution Engine" uses a distributed  
357 execution model that queues and routes tasks to the appropriate physical compute resources of  
358 the internal cloud or HPC facilities. Scientific analysis software is exposed through Narrative  
359 apps built and dynamically registered with KBase using the SDK. The software made accessible  
360 by apps and any system dependencies is captured and versioned using Docker<sup>34</sup>. The App  
361 Catalog maintains the dynamic repository of apps and Docker images and serves this  
362 information to the user interface and Execution Engine on demand. Reference and user data  
363 are stored identically in a system composed of structured data objects, flat files, and structured  
364 references. The references define relationships among types of data objects, enabling a  
365 traversable, integrated data model. A set of data services maintains versioning, provenance,  
366 permissions, and searching.

367 The physical infrastructure hosting the KBase software platform operates at Argonne National  
368 Laboratory and Lawrence Berkeley National Laboratory using an OpenStack managed cloud in  
369 combination with large-scale computers at DOE's National Energy Research Scientific  
370 Computing Center (NERSC) and Argonne Leadership Computing Facility (ALCF). Multiple  
371 deployments of platform services across sites provide some fault tolerance and failover  
372 capabilities.

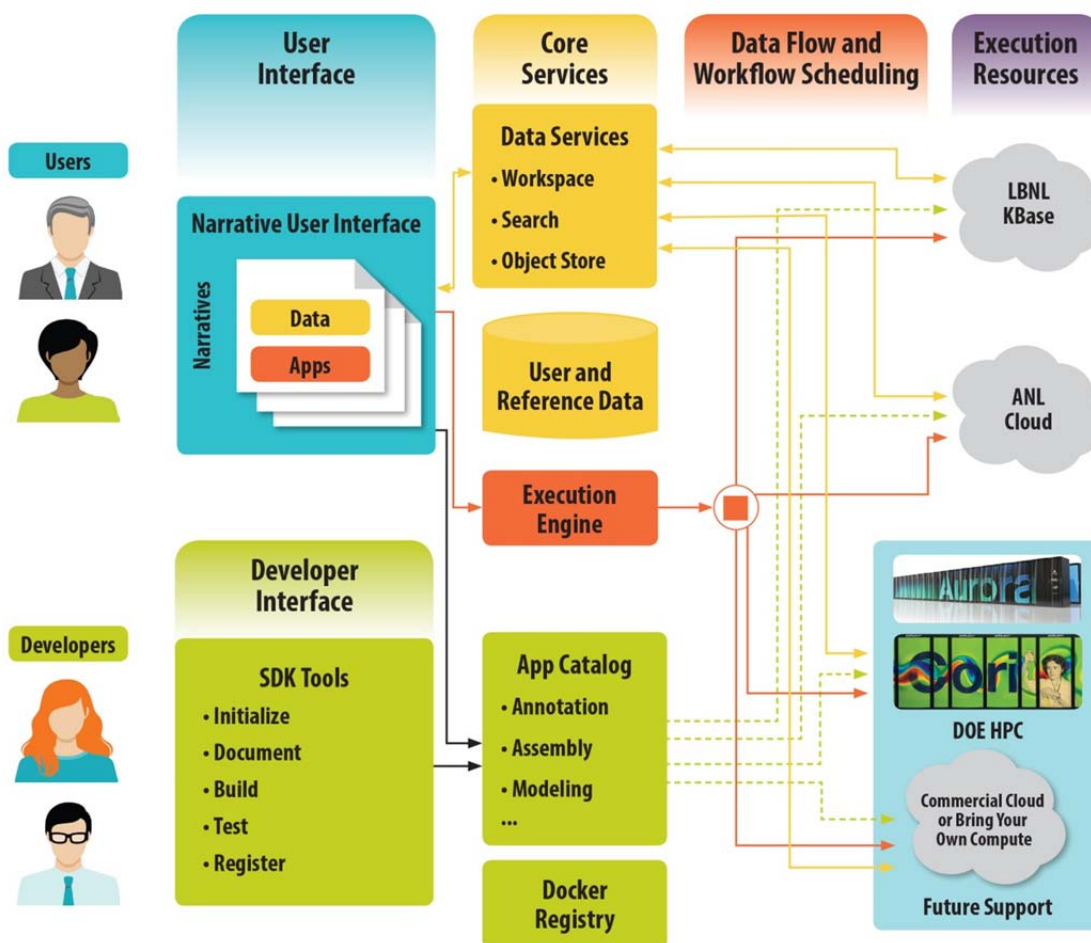

373  
374 **Figure 4.** KBase high-level architecture. KBase is based loosely on a service-oriented architecture that  
375 bundles related functionality into a set of independently scalable services that are managed to provide  
376 responsive interaction via the Narrative Interface. [Supercomputer images of Aurora courtesy Argonne National  
377 Laboratory (under a [Creative Commons license](https://creativecommons.org/licenses/by/4.0/)) and Cori courtesy the DOE National Energy Research Scientific  
378 Computing Center (NERSC) run by Lawrence Berkeley National Laboratory.]

### 379 Code Availability

380 KBase software, available at <https://github.com/kbase>, is open source and freely distributed  
381 under the MIT License.

### 382 Discussion

383 KBase has made some significant strides in leveraging the opportunities of this new data-rich  
384 era of biology. Important developments include (1) a detailed data model with support for  
385 provenance and versioning; (2) a rich and growing body of powerful analytical and modeling  
386 tools; (3) a collaborative user interface that seamlessly integrates data, analyses, and  
387 commentary to capture deep, reproducible scientific analyses; (4) an SDK enabling third-party

388 developers to extend the system with new tools; and (5) a robust, scalable, and extensible  
389 underlying computational infrastructure.

390 Since its first public production release in February 2015, the KBase platform has been used  
391 extensively by hundreds of users who have built thousands of Narratives. Among these  
392 analyses is work described in over 10 peer-reviewed publications covering a wide range of  
393 topics. KBase is the only platform where users can immediately apply many of the analysis tools  
394 used in these publications in a turnkey, compute-, and data-ready environment using a  
395 graphical interface.

396 Extensive user testing is being done to improve the user experience offered by KBase, as well  
397 as the range of apps. User feedback indicates that the user interface, with its graphical access  
398 to data and apps, enables researchers to quickly learn how to run sophisticated multi-step  
399 analyses, find collaborators, and share results. The current KBase release also contains  
400 prototype functionality allowing researchers to more fully leverage the power of the Jupyter  
401 Notebook by using use code cells to programmatically access KBase and build custom  
402 analyses. As KBase improves support for its programming interface and lowers the barrier for  
403 third-party incorporation of apps and data types, we anticipate rapid growth in platform  
404 functionality and adoption by the community.

405 A key area of improvement in the short term is extending the number and variety of apps and  
406 associated data types contributed by KBase personnel and external developers. Development  
407 will focus on expanding metagenomics capabilities, improving support for eukaryotic genomic  
408 analyses, and providing more-comprehensive comparative genomics tools. Upcoming  
409 developments specifically will include improving the input and processing of bulk data sets,  
410 easing the process for defining new data types and their relationships to other information in the  
411 system, enabling large-scale execution on cloud and HPC resources, and adding frameworks  
412 that simplify creation of visualizations.

413 KBase also plans to extend the social platform and user interface to allow (1) more flexible  
414 discovery of users; (2) formation of “projects” organizing people, data, and Narratives that can  
415 control their group privacy and sharing options more effectively; and (3) a formal process for  
416 publishing Narratives.

## 417 Acknowledgements

418 This work is supported by the Office of Biological and Environmental Research’s Genomic  
419 Science program within the U.S. Department of Energy Office of Science, under award numbers  
420 DE-AC02-05CH11231, DE-AC02-06CH11357, DE-AC05-00OR22725, and DE-AC02-  
421 98CH10886.

422

423

424

425

426

## 427 References

- 428 1 Prlić, A. & Procter, J. B. Ten Simple Rules for the Open Development of Scientific  
429 Software. *PLoS Computational Biology* **8**, e1002802, doi:10.1371/journal.pcbi.1002802  
430 (2012).
- 431 2 Millman, K. J., and Fernando Pérez. in *Implementing reproducible research* (ed  
432 Friedrich Leisch Victoria Stodden, and Roger D. Peng) 149-183 (CRC Press, 2014).
- 433 3 Stodden, V. *et al.* Enhancing reproducibility for computational methods. *Science* **354**,  
434 1240-1241, doi:10.1126/science.aah6168 (2016).
- 435 4 DOE Systems Biology Knowledgebase Implementation Plan,  
436 [http://genomicscience.energy.gov/compbio/kbase\\_plan/index.shtml](http://genomicscience.energy.gov/compbio/kbase_plan/index.shtml) (2010).
- 437 5 Perez, F. & Granger, B. E. IPython: A system for interactive scientific computing.  
438 *Comput Sci Eng* **9**, 21-29, doi:10.1109/MCSE.2007.53 (2007).
- 439 6 O'Leary, N. A. *et al.* Reference sequence (RefSeq) database at NCBI: current status,  
440 taxonomic expansion, and functional annotation. *Nucleic Acids Res* **44**, D733-745,  
441 doi:10.1093/nar/gkv1189 (2016).
- 442 7 Goodstein, D. M. *et al.* Phytozome: a comparative platform for green plant genomics.  
443 *Nucleic Acids Res* **40**, D1178-1186, doi:10.1093/nar/gkr944 (2012).
- 444 8 Hubbard, T. *et al.* The Ensembl genome database project. *Nucleic Acids Res* **30**, 38-41  
445 (2002).
- 446 9 Ashburner, M. *et al.* Gene ontology: tool for the unification of biology. The Gene  
447 Ontology Consortium. *Nat Genet* **25**, 25-29, doi:10.1038/75556 (2000).
- 448 10 Overbeek, R. *et al.* The subsystems approach to genome annotation and its use in the  
449 project to annotate 1000 genomes. *Nucleic Acids Res* **33**, 5691-5702,  
450 doi:10.1093/nar/gki866 (2005).
- 451 11 Finn, R. D. *et al.* Pfam: the protein families database. *Nucleic Acids Res* **42**, D222-230,  
452 doi:10.1093/nar/gkt1223 (2014).
- 453 12 Mulder, N. J. *et al.* New developments in the InterPro database. *Nucleic Acids Res* **35**,  
454 D224-228 (2007).
- 455 13 Aziz, R. K. *et al.* The RAST Server: rapid annotations using subsystems technology.  
456 *BMC Genomics* **9**, 75 (2008).
- 457 14 Price, M. N., Dehal, P. S. & Arkin, A. P. FastTree 2--approximately maximum-likelihood  
458 trees for large alignments. *PLoS One* **5**, e9490, doi:10.1371/journal.pone.0009490  
459 (2010).
- 460 15 Henry, C. S. *et al.* High-throughput generation, optimization and analysis of genome-  
461 scale metabolic models. *Nat Biotechnol* **28**, 977-982, doi:10.1038/nbt.1672 (2010).
- 462 16 Faria, J. P. *et al.* in *Hydrocarbon and Lipid Microbiology Protocols* 1-27 (Humana  
463 Press, 2016).
- 464 17 Latendresse, M. Efficiently gap-filling reaction networks. *BMC Bioinformatics* **15**, 225,  
465 doi:10.1186/1471-2105-15-225 (2014).
- 466 18 Dreyfuss, J. M. *et al.* Reconstruction and validation of a genome-scale metabolic model  
467 for the filamentous fungus *Neurospora crassa* using FARM. *PLoS Comput Biol* **9**,  
468 e1003126, doi:10.1371/journal.pcbi.1003126 (2013).
- 469 19 Ghosh, S. & Chan, C. K. Analysis of RNA-Seq Data Using TopHat and Cufflinks.  
470 *Methods Mol Biol* **1374**, 339-361, doi:10.1007/978-1-4939-3167-5\_18 (2016).
- 471 20 Faria, J. P. *et al.* Computing and Applying Atomic Regulons to Understand Gene  
472 Expression and Regulation. *Frontiers in Microbiology* **7**, doi:10.3389/fmicb.2016.01819  
473 (2016).

- 474 21 Deutschbauer, A. *et al.* Evidence-based annotation of gene function in *Shewanella*  
475 *oneidensis* MR-1 using genome-wide fitness profiling across 121 conditions. *PLoS*  
476 *Genet* **7**, e1002385, doi:10.1371/journal.pgen.1002385 (2011).
- 477 22 Ong, W. K. *et al.* Comparisons of *Shewanella* strains based on genome annotations,  
478 modeling, and experiments. *BMC Syst Biol* **8**, 31, doi:10.1186/1752-0509-8-31 (2014).
- 479 23 Copeland, A. *et al.* Complete sequence of *Shewanella amazonensis* SB2B,  
480 *EMBL/GenBank/DDBJ databases* <https://www.ncbi.nlm.nih.gov/genome/1223> (2006).
- 481 24 Venkateswaran, K., Dollhopf, M. E., Aller, R., Stackebrandt, E. & Nealson, K. H.  
482 *Shewanella amazonensis* sp. nov., a novel metal-reducing facultative anaerobe from  
483 Amazonian shelf muds. *Int J Syst Bacteriol* **48**, 965-972, doi:10.1099/00207713-48-3-  
484 965 (1998).
- 485 25 Wetmore, K. M. *et al.* Rapid quantification of mutant fitness in diverse bacteria by  
486 sequencing randomly bar-coded transposons. *MBio* **6**, e00306-00315,  
487 doi:10.1128/mBio.00306-15 (2015).
- 488 26 Seaver, S. M. *et al.* High-throughput comparison, functional annotation, and metabolic  
489 modeling of plant genomes using the PlantSEED resource. *Proceedings of the National*  
490 *Academy of Sciences of the United States of America* **111**, 9645-9650,  
491 doi:10.1073/pnas.1401329111 (2014).
- 492 27 Edirisinghe, J. N. *et al.* Modeling central metabolism and energy biosynthesis across  
493 microbial life. *BMC Genomics* **17**, 568, doi:10.1186/s12864-016-2887-8 (2016).
- 494 28 Henry, C. S. *et al.* Microbial Community Metabolic Modeling: A Community Data-Driven  
495 Network Reconstruction. *J Cell Physiol* **231**, 2339-2345, doi:10.1002/jcp.25428 (2016).
- 496 29 Marshall, C. *et al.* Electron transfer and carbon metabolism in an electrosynthetic  
497 microbial community, *Preprint at* <http://biorxiv.org/content/early/2016/07/07/059410>  
498 (2016).
- 499 30 Broberg, C. A., Wu, W., Cavalcoli, J. D., Miller, V. L. & Bachman, M. A. Complete  
500 Genome Sequence of *Klebsiella pneumoniae* Strain ATCC 43816 KPPR1, a Rifampin-  
501 Resistant Mutant Commonly Used in Animal, Genetic, and Molecular Biology Studies.  
502 *Genome Announc* **2**, doi:10.1128/genomeA.00924-14 (2014).
- 503 31 Henry, C. S. *et al.* Generation and validation of the iKp1289 metabolic model for  
504 *Klebsiella pneumoniae* KPPR1. *Journal of Infectious Disease* **In press** (2016).
- 505 32 Liao, Y. C. *et al.* An experimentally validated genome-scale metabolic reconstruction of  
506 *Klebsiella pneumoniae* MGH 78578, iYL1228. *J Bacteriol* **193**, 1710-1717,  
507 doi:10.1128/JB.01218-10 (2011).
- 508 33 Bachman, M. A. *et al.* Genome-Wide Identification of *Klebsiella pneumoniae* Fitness  
509 Genes during Lung Infection. *MBio* **6**, e00775, doi:10.1128/mBio.00775-15 (2015).
- 510 34 Anderson, C. Docker. *IEEE Software* **32**, 102-105 (2015).
- 511 35 Overbeek, R., Disz, T. & Stevens, R. The SEED: A peer-to-peer environment for  
512 genome annotation. *Commun ACM* **47**, 46-51, doi:Doi 10.1145/1029496.1029525  
513 (2004).
- 514 36 Dehal, P. S. *et al.* MicrobesOnline: an integrated portal for comparative and functional  
515 genomics. *Nucleic Acids Res* **38**, D396-400, doi:10.1093/nar/gkp919 (2010).
- 516 37 Brettin, T. *et al.* RASTtk: a modular and extensible implementation of the RAST  
517 algorithm for building custom annotation pipelines and annotating batches of genomes.  
518 *Sci Rep* **5**, 8365, doi:10.1038/srep08365 (2015).
- 519 38 Wattam, A. R. *et al.* PATRIC, the bacterial bioinformatics database and analysis  
520 resource. *Nucleic Acids Res* **42**, D581-591, doi:10.1093/nar/gkt1099 (2014).
- 521 39 Meyer, F. *et al.* The metagenomics RAST server - a public resource for the automatic  
522 phylogenetic and functional analysis of metagenomes. *BMC bioinformatics* **9**, 386,  
523 doi:10.1186/1471-2105-9-386 (2008).



- 524 40 Ware, D. *et al.* Gramene: a resource for comparative grass genomics. *Nucleic Acids Res*  
525 **30**, 103-105 (2002).
- 526 41 Goff, S. A. *et al.* The iPlant Collaborative: Cyberinfrastructure for Plant Biology. *Frontiers*  
527 *in plant science* **2**, 34, doi:10.3389/fpls.2011.00034 (2011).
- 528 42 Cipriano, M. J. *et al.* RegTransBase--a database of regulatory sequences and  
529 interactions based on literature: a resource for investigating transcriptional regulation in  
530 prokaryotes. *BMC Genomics* **14**, 213, doi:10.1186/1471-2164-14-213 (2013).
- 531 43 Novichkov, P. S. *et al.* RegPrecise 3.0--a resource for genome-scale exploration of  
532 transcriptional regulation in bacteria. *BMC Genomics* **14**, 745, doi:10.1186/1471-2164-  
533 14-745 (2013).
- 534 44 Goecks, J., Nekrutenko, A., Taylor, J. & Galaxy, T. Galaxy: a comprehensive approach  
535 for supporting accessible, reproducible, and transparent computational research in the  
536 life sciences. *Genome Biol* **11**, R86, doi:10.1186/gb-2010-11-8-r86 (2010).
- 537 45 Oinn, T. *et al.* Taverna: a tool for the composition and enactment of bioinformatics  
538 workflows. *Bioinformatics* **20**, 3045-3054, doi:10.1093/bioinformatics/bth361 (2004).
- 539 46 Towns, J. *et al.* XSEDE: Accelerating Scientific Discovery. *Comput Sci Eng* **16**, 62-74  
540 (2014).
- 541 47 Goble, C. A. *et al.* myExperiment: a repository and social network for the sharing of  
542 bioinformatics workflows. *Nucleic Acids Res* **38**, W677-682, doi:10.1093/nar/gkq429  
543 (2010).
- 544 48 Reich, M. *et al.* GenePattern 2.0. *Nat Genet* **38**, 500-501, doi:10.1038/ng0506-500  
545 (2006).
- 546 49 Schellenberger, J. *et al.* Quantitative prediction of cellular metabolism with constraint-  
547 based models: the COBRA Toolbox v2.0. *Nat Protoc* **6**, 1290-1307,  
548 doi:10.1038/nprot.2011.308 (2011).
- 549 50 Karp, P. D. *et al.* The EcoCyc and MetaCyc databases. *Nucleic Acids Res* **28**, 56-59  
550 (2000).
- 551 51 Agren, R. *et al.* The RAVEN toolbox and its use for generating a genome-scale  
552 metabolic model for *Penicillium chrysogenum*. *PLoS Comput Biol* **9**, e1002980,  
553 doi:10.1371/journal.pcbi.1002980 (2013).
- 554 52 Altintas, I. *et al.* Kepler: An extensible system for design and execution of scientific  
555 workflows. *16th International Conference on Scientific and Statistical Database*  
556 *Management, Proceedings*, 423-424 (2004).
- 557 53 E, D. Pegasus: A framework for mapping complex scientific workflows onto distributed  
558 systems. *Sci Programming-Neth* **13**, 219-237 (2005).
- 559 54 Ananthakrishnan, R., Chard, K., Foster, I. & Tuecke, S. Globus Platform-as-a-Service for  
560 Collaborative Science Applications. *Concurr Comp-Pract E* **27**, 290-305,  
561 doi:10.1002/cpe.3262 (2015).
- 562 55 Derry, J. M. J. *et al.* Developing predictive molecular maps of human disease through  
563 community-based modeling. *Nature Genetics* **44**, 127-130, doi:10.1038/ng.1089 (2012).

564

565

566 **Author Information**

567 **Affiliations**

568 Department of Bioengineering, University of California, Berkeley, California, USA.

569 Adam P. Arkin

570

571 Environmental Genomics and Systems Biology Division, E. O. Lawrence Berkeley National  
572 Laboratory, Berkeley, California, USA.

573 Adam P Arkin, Paramvir Dehal, Fernando Perez, Nomi L Harris, Shane Canon, Michael W  
574 Sneddon, Matthew L Henderson, William J Riehl, Dan Gunter, Stephen Chan, Roy T  
575 Kamimura, Dylan Chivian, Jason Baumohl, Ben Bowen, John-Marc Chandonia, Inna  
576 Dubchak, Marcin P Joachimiak, Pavel Novichkov, Erik Pearson, Sarah S Poon, Gavin A  
577 Price, Roman A Sutormin

578

579 Computer Science Department and Computation Institute, University of Chicago, Chicago,  
580 Illinois, USA.

581 Rick L Stevens

582

583 Computing, Environment, and Life Sciences Directorate, Argonne National Laboratory,  
584 Argonne, Illinois, USA.

585 Rick L Stevens, Thomas S Brettin, James J Davis, Emily Dietrich, Maulik Shukla, Fangfang Xia,  
586 Hyunseung Yoo

587

588 Biosciences Division, Oak Ridge National Laboratory, Oak Ridge, Tennessee, USA.

589 Robert W Cottingham, David J Weston, Brian H Davison, Benjamin H Allen, Meghan M Drake,  
590 Holly L Haun, Miriam L Land, Marissa Mills, Priya Ranjan, Mustafa H Syed

591

592 Biology Department, Brookhaven National Laboratory, Upton, New York, USA.

593 Sergei Maslov, Fei He, Shinjae Yoo

594

595 Mathematics and Computer Science Division, Argonne National Laboratory, Argonne, Illinois,  
596 USA.

597 Christopher S Henry, Dan Murphy-Olson, Folker Meyer, Elizabeth M Glass, Christopher C Bun,  
598 Ric Colasanti, Neal Conrad, Scott Devoid, Janaka N Edirisinghe, José P Faria, Paul M  
599 Frybarger, Wolfgang Gerlach, Kevin P Keegan, Gary J Olsen, Bob Olson, Bruce  
600 Parrello, Samuel M D Seaver

601

602 Cold Spring Harbor Laboratory, Cold Spring Harbor, New York, USA.

603 Doreen Ware, Sunita Kumari, Jer-Ming Chia, James Gurtowski, Vivek Kumar, Shiran Pasternak,  
604 Srividya Ramakrishnan, Michael C Schatz, James Thomason

605

606 Berkeley Institute for Data Science, University of California, Berkeley, California, USA.  
607 Fernando Perez  
608  
609 Department of Biology, Hope College, Holland, Michigan, USA.  
610 Aaron A Best  
611  
612 Department of Plant and Microbial Biology, University of California, Berkeley, California, USA.  
613 Steven E Brenner  
614  
615 Department of Computer Science, Hope College, Holland, Michigan, USA.  
616 Matthew DeJongh, Shinnosuke Kondo  
617  
618 Computation Institute, University of Chicago, Chicago, Illinois, USA.  
619 Janaka N Edirisinghe  
620  
621 Program in Computational Biology and Bioinformatics, Yale University, New Haven,  
622 Connecticut, USA.  
623 Gang Fang, Mark Gerstein, Daifeng Wang  
624  
625 Department of Plant Pathology and Genome Center, University of California-Davis, Davis  
626 California, USA.  
627 Joint BioEnergy Institute, Lawrence Berkeley National Laboratory, Berkeley, California, USA.  
628 Rashmi Jain, Taeyun Oh, Pamela C Ronald  
629  
630 Department of Microbiology, University of Illinois at Urbana-Champaign, Urbana, Illinois, USA.  
631 Gary J Olsen  
632  
633 Department of Plant Sciences, University of Tennessee, Knoxville, Tennessee, USA.  
634 Priya Ranjan  
635  
636 Department of Mathematics, Hope College, Holland, Michigan, USA.  
637 Nathan L Tintle  
638  
  
639 **Present Addresses**  
640 Department of Bioengineering and Carl R. Woese Institute for Genomic Biology, University of  
641 Illinois at Urbana-Champaign, Urbana, Illinois, USA.  
642 Sergei Maslov  
643  
644 New York University Shanghai Campus, Pudong, Shanghai, China.  
645 Gang Fang  
646

647 Department of Plant Pathology, Kansas State University, Manhattan, Kansas, USA.

648 Fei He

649

650 Center for Data Intensive Science, University of Chicago, Chicago, Illinois, USA.

651 Kevin P Keegan

652

653 Insilicogen. Inc., Giheung-gu, Yongin-si, Gyeonggi-do, Korea.

654 Taeyun Oh

655

656 Memorial Sloan Kettering Cancer Center, New York, New York, USA.

657 Mustafa H Syed

658

659 Dordt College, Sioux Center, Iowa, USA.

660 Nathan L Tintle

661

662 Department of Biomedical Informatics, Stony Brook University, Stony Brook, New York, USA.

663 Daifeng Wang

664

## 665 **Contributions**

666 APA, RLS, RWC, SM, CSH, PD, DW and FP developed the concept and vision.

667

668 APA, RLS, SC, MWS, MLH, WJR, DG, DMO, SYC, TSB, FM, DC, JB, AAB, BB, SEB, CCB, JMC,  
669 JC, RC, NC, JJD, MDJ, SD, FH, MPJ, KPK, BO, SP, EP, GAP, SR, PR, SMDS, MS, RAS, MHS, JT, FX,  
670 HSY and SY designed and developed the system.

671

672 RWC, NLH, RK, DC, DJW, EMG, BHD, SK, BHA, ED, MMD, ID, JNE, GF, JPF, PMF, WG, MG, JG, RJ,  
673 SNK, VK, MLL, MDM, PN, OTY, GJO, BDP, SSP, PCR, MCS, NLT and DFW developed, documented  
674 and conducted testing and validation.

675

676 APA and CSH drafted the manuscript.

677

678 NLH, HLH, BHA, MDM, MPJ, AAB, JMC, DC, BO, BHD, NLT, SM, PCR and MDJ revised the  
679 manuscript and provided important intellectual content.

680

681 APA, RWC and CSH reviewed and approved the final version to be published.

## 682 **Competing financial interests**

683 FP declares competing financial interest related to his work for Plot.ly, Microsoft, Google, and  
684 Continuum Analytics.

685 SEB receives funding and has a research collaboration with Tata Consultancy Service that is  
686 unrelated to the KBase project.

687 All other authors declare no competing financial interests.

688 **Corresponding author**

689 Correspondence and requests for materials should be addressed to: [APArkin@lbl.gov](mailto:APArkin@lbl.gov)
